# Supplementary material for: Quality assessment from biobank plasma and serum specimens: a systematic review
Source: PeerJ. 2025 Oct 8;13:e20122. doi: 10.7717/peerj.20122 (PMC12514999; doi:10.7717/peerj.20122)
Supplement: Supplemental Information 1 [file peerj-13-20122-s001.xlsx]

## Sheet: Sheet1
Study characteristics						Diagnostic measures							Predictive measures
Number	First author	Country	Year	samples type		Delayed separation （h）	Delayed separation temperature (°C)	number of freeze/thaw cycles	Storage time (months)/ range	Storage temperature (°C)		Group	Measurand	Stability
														Condition 1	Condition 2	Condition	Measurement method
1	Zhao Wang	China	2024	serum, plasma		NR	NR	NR	≤36 >36	-80		Metabolites Sterols other	FSH E2 LH GLU PRL TESTO TG TC HDL LDL	NR	NR	stable Unstable↑（36 months） Unstable↓（36 months） Unstable ↑（36 months） Unstable↑（36 months） Stable Unstable↓（36 months） Unstable↓（36 months） Unstable↓（36 months） Unstable↓（36 months）	chemiluminescence
2	Olga Kofanova	Luxembourg	2023	Serum, Plasma		NR	NR	NR	12 60 120	-80		Cytokines other	sCD40L IL-8 IL-16 Complement C ICAM1 VCAM1	NR	NR	Unstable↑（120 months）） stable stable Unstable↓（60 months） stable stable	ELISA
3	Etienne Mondésert	France	2024	Serum		NR	NR	NR	0 12	-18		Metabolites Enzymes Sterols other	CEA AFP CA125 CA15-3 CA19-9 TPSA FPSA CT TG NSE	NR	NR	Stable Unstable↓（12 months） Unstable↓（12 months） Unstable↓（12 months） Stable Unstable↓（12 months） Unstable↓（12 months） Unstable↓（12 months） Stable Unstable↓（12 months）	Immuno-enzymatic
4	Christian Z. Jensen	Denmark	2023	Serum		30-120	4	NR	NR	-80		Enzymes	Anti-TPO concentration	Stable	NR	NR	Immunofluorescent
5	Hee Jin Huh	Korea	2023	Serum		NR	NR	NR	NR	-70 -20 37		other	Anti-HIV-1	NR	NR	Stable	Alinity i HIV Ag/Ab combo assay
6	Estibaliz Alegre	Spain	2022	Serum		NR	NR	NR	132 ± 46.8	<-70		other Enzymes Sterols	ALT AST Cr Glucose Mg k Na Bilirubin Urea Cholesterol	NR	NR	Unstable↓（132 ± 46.8 months） Stable Unstable↑（132 ± 46.8 months） Unstable↑（132 ± 46.8 months） Unstable↓（132 ± 46.8 months） Unstable↑（132 ± 46.8 months） Unstable↑（132 ± 46.8 months） Unstable↓（132 ± 46.8 months） Unstable↓（132 ± 46.8 months） Unstable↓（132 ± 46.8 months）	Enzymatic colorimetric 、Enzyme-kinetic assay
7	Inge MW Verberk	Netherlands	2021	Plasma		0.5 1 3 24	2-8	0 1 2 4	0.5	-80 -20 2-8		Cytokines	IFN-γ IL-10 IL-12p70 IL-17A IL-6 TNF-α IFN-γ IL-10 IL-12p70 IL-17A IL-6 TNF-α	Unstable↓ (RT 24h) Stable Stable Unstable↓ (RT 3h，24h) Unstable↓ (RT 3h，24h) Unstable↑ (RT 24h) Unstable↑ (4°C 24h) Stable Stable Unstable↑(4°C 24h) Unstable↓ (4°C 24h) Stable (4°C 24h)	Stable( 4 cycles) Stable( 4 cycles) Stable( 4 cycles) Stable( 4 cycles) Stable(4 cycles) Stable( 4 cycles)	Stable Stable Stable Unstable↓(2-8°C ) Stable Stable Stable Stable Stable Unstable↑(-20°C ) Stable Stable	ELISA
8	Jie Gao	Norway	2021	plasma, serum		1-192	RT	1-9	NR	-80		Cytokines	CRP SAA (all proteoforms) S100A8 S100A9 S100A8/S100A9t ratio CnCn CnCo CnCds CnCdssp CnCn/CnCo ratio	Stable Stable Unstable↓ (RT 2d) Unstable ↓ (RT 2d) Stable Stable Stable Unstable↓ (RT 12h) Unstable↑ ( RT 2d) Stable	Stable( 9 cycles) Stable( 9 cycles) Stable( 9 cycles) Stable( 9 cycles) Stable( 9 cycles) Stable( 9 cycles) Stable( 9 cycles) Stable( 9 cycles) Stable( 9 cycles) Stable( 9 cycles)	NR	Immuno-MALDI-TOF MS
9	Rui Zheng	Sweden	2021	Plasma		0.09 1.5 2.5 3.5	4 25 37	NR	NR	-80		Metabolites	Linoleyl carnitine Serotonin Lactate	Unstable↑ (37°C 3.5h) Unstable↓ (4°C 1.5h) Unstable↑ (37°C 3.5h)	NR	NR	LC-MS
10	Florentin Späth	Sweden	2021	Plasma, Serum		NR	NR	NR	>23-120 >120-240	-80°C		Cytokines	IL-10 IL-13 TNFα CXCL13 MCP-3 MIP-1β MIP-1α VEGF FGF-2 TGFα sIL2Rα sIL6R sVEGF-R2 sTNF-R1 sTNF-R2 sCD23 sCD27 sCD30	NR	NR	Stable Stable Stable Stable Stable Unstable↓（120 months） Unstable↓（120 months） Stable Stable Stable Stable Stable Stable Stable Unstable↓（10 months） Stable Stable Stable	Luminex ELISA
11	Xueli Jiang	China	2020	Plasma		NR	NR	NR	12-72	-80		Other	cfDNA)	NR	NR	Stable	Qubit 3.0 fluorometer
12	Alexander Y. Pan	Canada	2019	Serum		0.5 8 24 48 72	RT	NR	NR	NR		Cytokines	IL-1β IL-6 IL-8 IL-10 TNFα IFNγ	Unstable↑(24h) Unstable↑(48h) Unstable↑(4h) Unstable↑(24h) Unstable↑(24h) Unstable↑(48h)	NR	NR	ELISA
13	Katrin Freiburghaus	Switzerland	2020	Plasma		NR	NR	NR	0.1	-80 -196 CRF		Electrolytes Enzymes Sterols	Calcium Potassium Sodium ALT LDH Lipase Uric acid Albumin CRP Total protein	NR		Stable Stable Stable Stable Stable Stable Stable Stable Stable Stable	Cobas 8000 analyzer series
14	Fabien B. Vincent	Australia	2019	Serum, Plasma		NR	NR	NR	1	-80 4 °C		Cytokines	CCL2 CCL19 IL-1α IL-1RI IL-1RII IL-1ra IL-6 IL-18 IL-33 MIF TNFα IFNγ	NR	NR	Stable Unstable↓ ( 4d) Stable Stable Stable Stable Stable Stable Stable Stable Stable Stable	Multi-analyte profiling (MAP)
15	Nicolle Schwarz	Germany	2019	Serum		0.5 1 2 4	4 RT 30	NR	0 0.07	-80		Metabolites	TAU	Unstable↓（RT,2h） Unstable↓（RT,4h,） Unstable↓（4℃,4h,）	NR	NR	LC-MS/MS
16	Isaac Barroso	Portugal	2018	Serum, Plasma		NR	NR	NR	0 60	-80		Electrolytes	Zn+	Stable	NR	Stable	FAAS
17	Pedro Araujo	Norway	2018	Plasma, Serum		NR	NR	1 2 3 4 5 6	13	-80 -20		Metabolites	Fatty Acid		Unstable↑（2cycles)）	Unstable↓(-20℃)	GC FAAS
18	Michael R. La Frano	USA	2018	Serum		216	4-RT	1	NR	-80		Metabolites	428 compounds	Unstable（260，61%）	Unstable（68，16%）	NR	LC-MS/MS GC-TOF-MS
19	Qiujin Shen	Sweden	2017	Plasma		1 3 8 24 36	4 22	2 4 8	NR	NR		Cytokines Proteins	139 compounds	1，3, 8, 24 and 36 h at 4 °C are 4%, 6%, 9% and 15% 1， 3, 8, 24 and 36 h at 22 °C are 5%, 10%, 16%, 28% and 31%	Stable（82）	NR	Multiplex PEA
20	Olga Kofanova	Luxembourg	2018	serum, plasma		24 48	RT	NR	NR	NR		Cytokines	IL8 IL16	Stable Stable	NR	NR	ELISA
21	C Dard	France	2017	Serum		NR	NR	NR	1-120	-20		Proteins	IgG IgM	NR	NR	Unstable↑↓(24 months) Unstable↓(84 months)	ELISA
22	Robert P. van Waateringe	Netherlands	2017	Plasma		NR	NR	NR	18 24	-80		Cytokines	hsCRP hsIL-6 hsTNF-α	NR	NR	Stable Stable Stable	ELISA
23	Randi E. Gislefoss	Norway	2017	Serum		NR	NR	1 2 3 4 5 6 7 8 9 10	2.5	-25		Electrolytes Enzymes Sterols Other	Albumin ASAT Bilirubin Cholesterol Creatinine CRP Glucose IgG Potassium Sodium Testosterone Triglycerides TSH Urea Vitamin B12	NR	Stable Stable Unstable↓（1-10 cycles)） Stable Stable Stable Stable Stable Stable Stable Unstable↓（4cycles)） Stable Unstable↓（5、10cycles)） Stable Stable		Enzymatic assa Ion selective electrode
24	Jae-Eun Lee	Korea	2016	Plasma, Serum		NR	NR	1 2 3 4	NR	-70		Enzymes	ProGRP	NR	Unstable↑（4cycles)）	NR	Immunoassay
25	RJean-Pierre Trezzi	Luxembourg	2017	Plasma		0.17 0.5 1	4 RT	NR	NR	-80		Metabolites	236 compounds	Unstable (RT,48/236 (20.3%)) Unstable (1h,3/236 (2%))	NR	NR	GC-MS
26	Jae-Eun Lee	Korea	2016	Plasma, Serum		2 6 24 48	4 RT	NR	NR	-70		Enzymes Other	ALT AST IP K⁺ LDH	Unstable↓(4℃ 4h) Unstable↓(4℃ 4h,6h,24h),Unstable(22℃24h) Unstable↓(4℃ 4h,6h,24h),Unstable(22℃ 4h,6h,24h) Unstable↑(4℃ 4h,6h,24h),Unstable(22℃ 4h,6h,24h) Unstable↑(4℃ ,24h),Unstable(22℃ 4h,6h,24h)	NR	NR	Automated chemistry analyzer, Hemoglobin Assay Kit
27	Juliane Dorow	Germany	2016	Plasma, Serum		2	4 RT	NR	1-6	-20 -80 -150		Metabolites	34 compounds	NR	Unstable↑（1，1cycles)） Unstable↑（2，2 cycles）, Unstable↑（ 4，5 cycles）	Unstable↑（17,-20℃） Unstable↓（8,-80℃） Unstable↓（3,-450℃）	LC-MS/MS
28	Randi E. Gislefoss	Norway	2014	Serum		NR	NR	NR	0 48 204 348	-25		Enzymes Sterols Other	Apo-A1 Apo-B HDL-C LDL-C PRL Cholesterol FSH LH TSH FT4	NR	NR	Unstable↑ (29 years) Unstable↑ (29 years) Unstable↓ (29 years) Unstable↑ (29 years） Unstable↓ (29 years) Unstable↓ (29 years) Stable Stable Stable Stable	Immunoturbidimetric, Enzymatic, Electrochemiluminescence
29	Jae-Eun Lee	Korea	2015	Plasma, Serum		NR	NR	3 4 5	NR	-80		Cytokines	IL-8 IL-15 IL-17A MMP-7 TNF-a VEGF VEGF-R2 IFN-γ	NR	Stable Stable Stable Unstable↑（ 3 cycles） Unstable↓（ 3 cycles） Unstable↑（ 3 cycles） Stable Stable	NR	ELISA Millipore
30	ohannes Zander	Germany	2013	Serum, Plasma		NR	NR	NR	0 0.24 30 90	4 -20 -80 < -130		Cytokines Electrolytes Enzymes Metabolites Other	Electrolytes Sodium (Na) Total calcium (Ca) Enzymes ALT GLDH LDH CK Lipase MMP-9 Metabolites Glucose Cholesterol (phot.) Proteins Total protein Albumin IgG Complement C3 Ketone bodies Total ketone bodies 3-Hydroxybutyric acid Hormones Insulin Free thyroxine Cytokines TNF-α Coagulation Factor V Factor VII Factor VIII Factor XI Free protein S Sterols (MS) All sterols	Unstable↑ (4℃,0.25-3 months ) Unstable↑ (4℃,3 months) Stable Stable Unstable↓ (4℃,3 months) Stable Stable Stable Unstable↓ (4℃,0.25-3 months) Unstable↑ (4℃,0.25-3 months) Unstable↑ 4℃,(3 months) Stable Unstable↑ (4℃,3 months) Unstable↑ (4℃,0.25-3 months) Unstable↓ (4℃,3 months) Stable Stable Unstable↑ (4℃,3 months) Unstable↓ (4℃,1-3 months) Unstable↓ (4℃,3 months) Stable Unstable↓ (4℃,3 months) S…	Unstable↑ (-20℃,3 months) Unstable↑ (-20℃,3 months) Unstable↓ (-20℃,0.25months) Stable Unstable↓ (-20℃,0.25-3 months) Unstable↓ (-20℃,0.25-3 months) Stable(-20℃,) Stable(-20℃,) Unstable↓ (-20℃,3 months) Unstable↑ (-20℃,3 months) Stable(-20℃,) Stable(-20℃,) Stable(-20℃,) Unstable↑ (-20℃,3 months) Unstable↓ (-20℃,3 months) Stable(-20℃,) Stable(-20℃,) Unstable↑ (-20℃,3 months) Stable(-20℃,) Unstable…	Stable(-80℃,) Stable(-80℃,) Stable(-80℃,) Stable(-80℃,) Stable(-80℃,) Stable(-80℃,) Stable(-80℃,) Stable(-80℃,) Stable(-80℃,) Stable(-80℃,) Stable(-80℃,) Stable(-80℃,) Stable(-80℃,) Stable(-80℃,) Stable(-80℃,) Stable(-80℃,) Stable(-80℃,) Stable(-80℃,) Stable(-80℃,) Stable(-80℃,) Stable(-80℃,) Stable(-80℃,) Stable(-80℃,) Stable(-80℃,) Stable(-80℃,)	Photometry Immunoassay Turbidimetry ChemiluminescenceChemiluminescence
31	Hyun Ju Kang	Korea	2013	Serum, Plasma		0.5 1 2 4 24	RT	0 1 3 6 9	NR	NR		Enzymes Sterols	Glucose GGT LDH AST BUN Cr ALT TC TG CRP	Unstable↓ (RT 1h) Unstable↑ (RT 1h) Unstable↑ (RT 1h) Unstable↑ (RT 1h) Unstable↑ (RT 4h) Unstable↑ (RT 1h) Unstable↑ (RT 24h) Unstable↑ (RT 4h) Stable Stable	Stable Unstable↑ ( 1 cycle) Unstable↑ ( 1 cycle) Unstable↑ ( 1 cycle) Unstable↑ ( 1 cycle) Stable Unstable↓ ( 6 cycles) Stable Unstable↓ ( 6 cycles) Stable	NR	Chemistry Autoanalyzer
32	Peiyuan Yin	China	2013	Serum, Plasma		2 4 8 24	RT	1 2 3 4	NR	NR		Metabolites	Chemical noise (PEG) Hypoxanthine (S-1-P) Lyso-PC C16:0 Lyso-PC C18:0 Linolenyl carnitine L-carnitine	Unstable↑ (RT 2h,4h,8h,24h) Unstable↑ (RT 2h,4h,8h,24h) Unstable↑(RT 2h,4h,8h,24h) Stable Stable Unstable↑(RT 2h,4h,8h,24h) Stable	Unstable↓ Stable Stable Stable Stable Stable Unstable↓ ( 2-4 1 cycles)		LC-MS
33	Serap Cuhadar	Turkey	2013	Serum		NR	NR	1-10	1 2 3	-20		Metabolites Enzymes Sterols Other	Albumin ALT AST Bilirubin, total Bilirubin, direct BUN Calcium Cholesterol Creatinine CK Glucose GGT HDL LD (LDH) Protein, total Triglyceride Uric acid	NR	Unstable↑ ( 7-10 cycles) Stable Stable Unstable↓ ( 1-3 cycles ) Stable Unstable↑ ( 4-10 cycles) Unstable↑↓ (1-5 cycles↑,5-10cycles↓) Stable Stable Unstable↓ ( 4-10 cycles) Stable Stable Stable Unstable↓ ( 1-10 cycles) Unstable↑ ( 4-10 cycles) Stable Unstable↑ ( 1-10 cycles	Unstable↓ (-20℃) Stable(-20℃) Stable(-20℃) Stable(-20℃) Stable(-20℃) Unstable↑(-20℃) Stable(-20℃) Stable(-20℃) Stable(-20℃) Stable(-20℃) Stable(-20℃) Stable(-20℃) Stable(-20℃) Unstable↓(-20℃) Unstable↓(-20℃) Stable(-20℃) Stable(-20℃)	Chemical analysis
34	Shine-Young Kim	South Korea	2012	Serum, Plasma		2 4 6 8	RT	NR	NR	NR		Other	ΔProGRP	Unstable↑ (RT,2-8h)	NR	NR	immunoassay
35	Kalle Kisand	Estonia	2011	Serum		NR	NR	1 3 6	NR	-20 -75		Cytokines	MMP-7 TIMP-1 VEGF VEGF-R2	NR	Unstable↑ ( 3-6 cycles) Stable Unstable↑ ( 1 -6cycles) Unstable↑ ( 3-6 cycles)	Stable Unstable↑(-75℃) Unstable↑(-75℃) Stable	ELISA
36	Rita Hannisdal	Norway	2010	Serum		NR	NR	NR	0 4 6 17 29	-25		Metabolites	5mTHF hmTHF Folate tHcy MMA Vitamin B-12	NR	NR	Unstable↓ （12 months ） Unstable↓ （48 months ） Unstable↓ （12 months ） Stable Stable Unstable↓ （12 months ）	LC-MS/MS, Microbiological
37		Sweden	2010	Plasma		NR	NR	NR	60 132 180	-80		Enzymes	tPA PAI-1 tPA-PAI-1 complex	NR	NR	Stable Stable Stable	ELISA
38	Randi E. Gislefoss	Norway	2009	Serum		NR	NR	NR	1 24 300	-25		Enzymes Sterols	ALT Albumin AST CK Cystatin C Ferritin IgE IgG C-peptide SHBG Transferrin	NR	NR	Unstable↓ （24 months，300 months） Unstable↓ （24 months，300 months） Stable Unstable↓（24 months，300 months） Stable Unstable↓ （300 months） Stable Stable Unstable↓（24 months，300 months） Unstable↑（300 months） Unstable↑ （300 months）	ELISA
39	Randi E. Gislefoss	Norway	2008	Serum				NR	1 24 300	-25		Electrolytes Cytokines	Na K Ca Fe Cr Uric Acid Bilirubin	NR	NR	Unstable↑（300 months） Unstable↑ （24 months，300 months） Unstable↑（300 months） Stable Stable Unstable↓ （24 months，300 months） Unstable↓ （24 months，300 months）	Modular P Analyzer
40	Kristin Skogstrand	Denmark	2008	Plasma, Serum,		0 4 24 48	4 RT 35	NR	NR	NR		Cytokines	IL-1b IL-4 IL-5 IL-6 IL-8 IL-10 IL-12 IL-17 IL-18 sIL-6ra IFN-g TNF-a TNF-b MCP-1 TGF-b MIP-1a MIP-1b MMP-9 TREM-1 BDNF GM-CSF NT-4 NT-3 STNF RI MIF RANTES CRP	Stable (4℃ ) Stable (4℃ ) Untable↑ (4℃，4h ) Stable (4℃ ) Stable (4℃ ) Stable (4℃ ) Stable (4℃ ) Untable↑ (4℃，4h,48h ) Stable (4℃ ) Stable (4℃ ) Stable (4℃ ) Stable (4℃ ) Untable↑ (4℃，4h,48h ) Stable (4℃ ) Stable (4℃ ) Untable↑ (4℃，48h ) Untable↑ (4℃，24h,48h ) Stable (4℃ ) Stable (4℃ ) Untable↑ (4℃，4h,48h ) Untable↑ (4℃，4h ) Stable (4℃ ) Stable (4℃ ) Untable↑ (4℃，24h ) Untable↑ (4℃，24h,48h ) Untab…	Unstable ↑ (RT,4h,24h,48h ) Stable (RT ) Unstable↑ (RT,4h,24h,48h ) Unstable↑ (RT,24h,48h ) Unstable ↑ (RT,24h,48h ) Stable (RT ) Stable ↑ (RT,48h ) Unstable ↑ (RT,4h,24h,48h ) Unstable ↑ (RT,24h,48h ) Stable (RT,4h ) Stable (RT,4h ) Unstable↑ (RT,24h,48h ) Unstable ↑ (RT,4h,24h,48h ) Unstable ↑ (RT,24h,48h ) Unstable↑ (RT,24h,48h ) Unstable↑ (RT,4h,24h,48h ) Unstable ↑ (RT,4h,24h,48h ) Unstable↑…	Unstable ↑ (35℃,4h,24h,48h ) Stable (35℃ ) Stable (35℃ ) Stable (35℃ ) Unstable ↑ (35℃24h,48h ) Stable (35℃ ) Stable (35℃ ) Unstable↑ (35℃,4h,24h,48h ) Unstable ↑ (35℃,4h,24h,48h ) Stable (35℃ ) Stable (35℃ ) Stable (35℃ ) Unstable↑ (35℃,4h,24h,48h ) Stable (35℃ ) Stable (35℃ ) Stable (35℃ ) Stable (35℃ ) Unstable↑ (35℃,24h ) Stable (35℃ ) Unstable↑ (35℃,4h,24h,48h ) Stable (35℃ ) Stable (35℃ ) U…	Luminex xMAP ELISA
41	Liv Paltiel	Norway	2008	Plasma		NR	NR	1-100	12 24	-80		Electrolytes Enzymes Sterols Other	Sodium Cholesterol Triglycerides fatty acids Vitamin E AST	NR	Stable Unstable↓ ( 20 cycles) Unstable↓ ( 20 cycles) Unstable↑ ( 10 cycles) Unstable↓( 50 cycles) Unstable↑ ( 30 cycles）	Stable Stable Unstable↓ （12 months） Stable Unstable↑ （24months） Stable	Chemical
42	Juliette Lengellé	France	2008	Serum		NR	NR	1 5 10	0.01 0.02 0.07	16–25 20 37 -80		Cytokines	sCD40L	NR	Unstable↓( 10 cycles)	Unstable↓（ 12h ，37°C；48h， 20°C)	Proteome Profiler Arra
43	Christine Chaigneau	France	2007	serum		24-240	37	1-100	NR	-80		Cytokines	sPLA2 MMP7 anti-HBs IgG TGF-β1	Unstable↑( 10 days) Unstable↓( 8 days) Stable Unstable↑	Unstable↓ ( 15 cycles） Unstable↓( 30 cycles） Stable Stable	NR	ELISA
44	Olov Rolandsson	Sweden	2004	serum		NR	NR	NR	0 12-144	-80		Proteins	HbA1c	NR	NR	Stable	HPLC
45	Beate Kamlage	Germany	2018	Serum, Plasma		6 24	RT	NR		NR		Metabolites	Metabolites(225)	20%↑,4%↓		NR	NMR
46	Beate Kamlage	Germany	2014	Plasma		16	RT	NR	NR	NR		Metabolites	12-Hydroxyetoxatetraenoic acid (C20:c6j5,8,1014) 12-Hydroxylreptadecatrienoic acid (C17:J5810)b 5-Hydroxyetoxatetraenoic acid (C20:translj6/c68s1114)d (5-HETE) 9-Hydroxyoctadecadienoic acid (C18:transl10/acj12)b (9-HODE) Noradrenaline (forepinephrine) Thromboxane B2 Dopamine Normetanephrine Serotonin (5-HT) 13-Hydroxyoctadecadienoic acid (C18:c4j9jtransf11)b (13-HODE) 3,4-Dihydroxyphenylacetic ac…	Unstable↑ Unstable↑ Unstable↑ Unstable↑ Unstable↓ Unstable↑ Stable Stable Stable Unstable↑ Unstable↓ Unstable↓ Unstable↓ Stable Unstable↑ Unstable↑ Unstable↑ Unstable↓ Unstable↑ Unstable↑ Unstable↑ Unstable↑ Unstable↑ Unstable↑ Stable Unstable↑ Stable Stable Stable Stable Stable Unstable↑ Unstable↓ Unstable↓ Unstable↓	NR	NR	NMR
NR, not reported;↓reduce；↑Increase
